# Supplementary material for: Targeted Liposomal Chemotherapies to Treat Triple-Negative Breast Cancer
Source: MDPI journal article supplement (doi:10.3390/cancers13153749), 2021-07-26
Supplement: s1 [file s1]

*Supplementary Files*

# Targeted Liposomal Chemotherapies to Treat Triple-Negative Breast Cancer

Yingnan Si, Ya Zhang, Hanh Giai Ngo, Jia-Shiung Guan, Kai Chen, Qing Wang, Ajeet Pal Singh, Yuanxin Xu, Lufang Zhou, Eddy S. Yang and Xiaoguang “Margaret” Liu

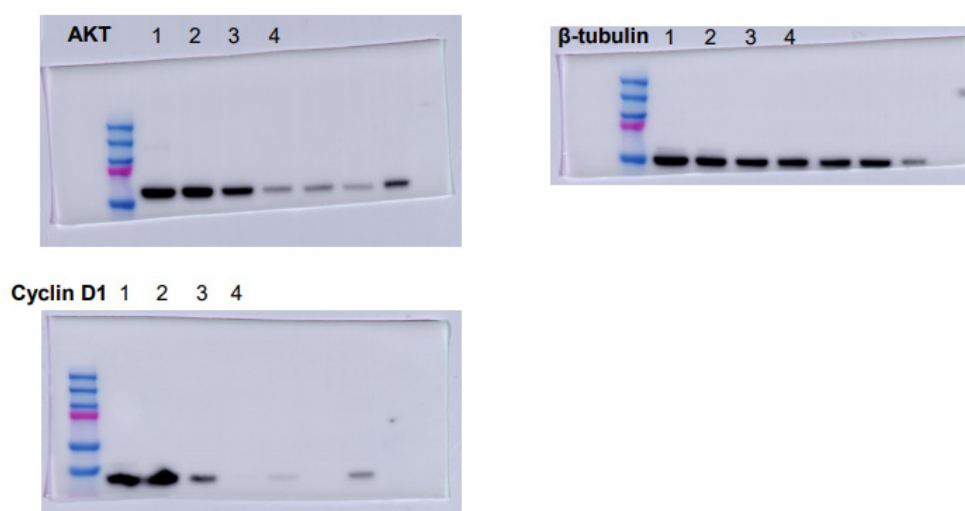

**Figure S1.** Original western blots data.
